# Supplementary material for: In situ production of hybrid N 2 O in dust-rich Antarctic ice
Source: Copernicus journal article supplement (doi:10.5194/egusphere-2025-3108), 2025-07-10
Supplement: Supplementary file [file egusphere-2025-3108-AC1-supplement.pdf]

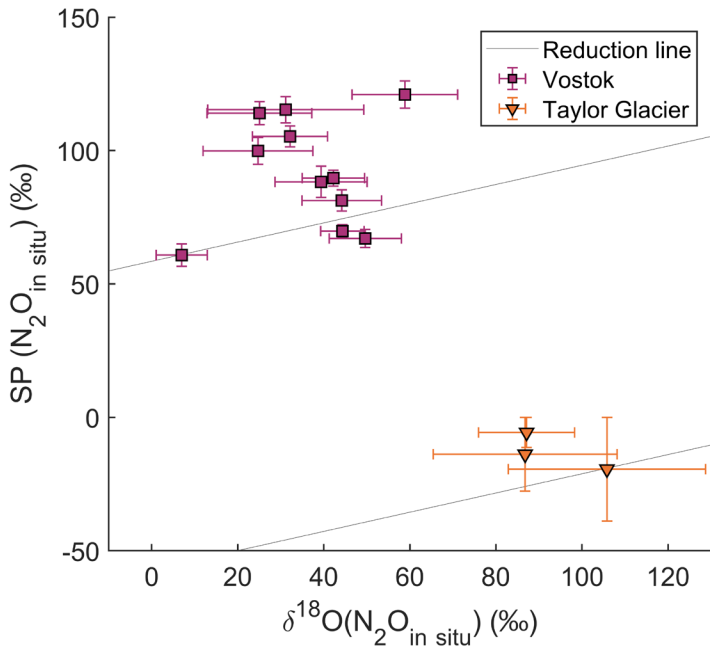

**Figure 8. Dual isotope plot of  $\delta^{18}\text{O}$  and site preference (SP) values of in situ  $\text{N}_2\text{O}$ . Theoretical  $\text{N}_2\text{O}$  reduction lines are shown for comparison, with intercepts calculated assuming that samples with the lowest SP values are unaffected by  $\text{N}_2\text{O}$  reduction. The slope of the reduction line corresponds to the median of published fractionation ratios for SP versus  $\delta^{18}\text{O}$  during  $\text{N}_2\text{O}$  reduction, as reported by Yu et al. (2020).**
