# Supplementary material for: In situ production of hybrid N 2 O in dust-rich Antarctic ice
Source: Copernicus journal article supplement (doi:10.5194/egusphere-2025-3108), 2025-07-10
Supplement: Supplementary file [file egusphere-2025-3108-AC2-supplement.pdf]

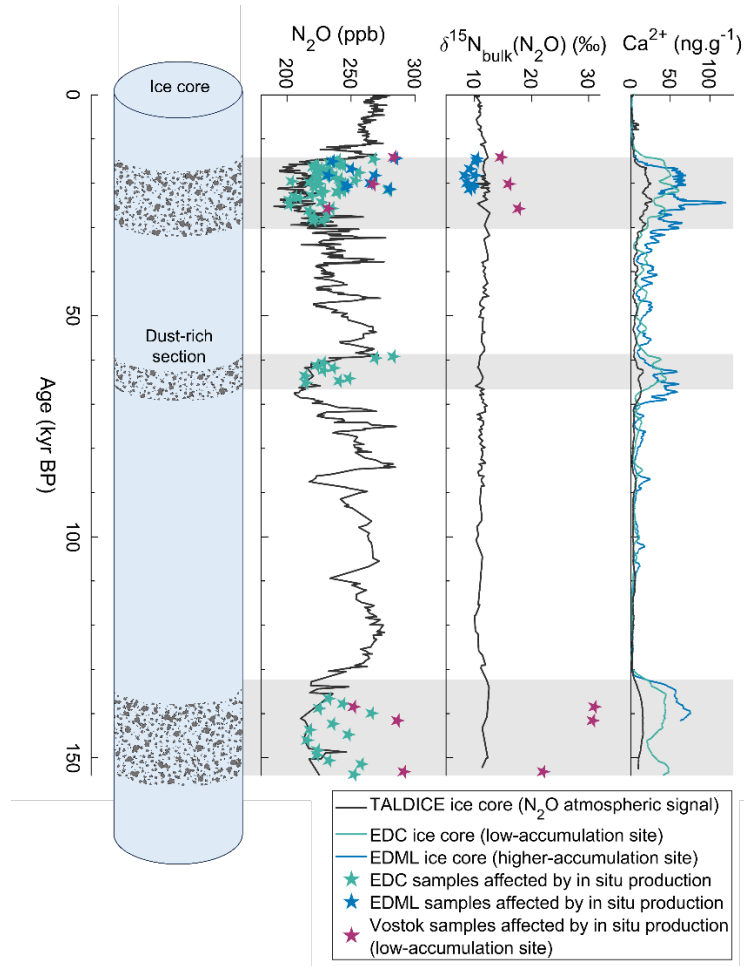

**Figure 1.**  $\text{N}_2\text{O}$  mixing ratio,  $\text{N}_2\text{O}$  bulk nitrogen isotopic composition, and  $\text{Ca}^{2+}$  concentrations that represent the mineral dust content, measured in the TALDICE (Schilt et al., 2010a), EDC (Schilt et al., 2010b), EDML (Fischer et al., 2019), and Vostok (Miteva et al., 2007) ice cores. Because of its low dust content, the TALDICE record in black is considered to represent the true atmospheric  $\text{N}_2\text{O}$  levels (see Sect. 3.2.2). Stars correspond to samples affected by in situ production and represent the total  $\text{N}_2\text{O}$  measured, i.e., atmospheric  $\text{N}_2\text{O}$  + in situ  $\text{N}_2\text{O}$ . Grey boxes mark the dust-rich sections of the EDC ice core corresponding to the Last Glacial Maximum (LGM), the Marine Isotope Stage (MIS) 4 and 6 cold periods.
